# Supplementary material for: Reflexiones sobre las perspectivas de fin de milenio para la legislación eclesiástica italiana
Source: Royal Society of Chemistry journal article supplement (doi:10.1039/d2bm01617f), 1992-01-01
Supplement: d2bm01617f1.pdf [file d2bm01617f1.pdf]

### Supplementary Information

## Potent Intrinsic Bactericidal Activity of Novel Copper Telluride Nano-grape Clusters with Facile Harvest

Yanwen Zhou, †<sup>a, b</sup> Haozhuo Lei, †<sup>b</sup> Meng Wang,<sup>b</sup> Yanbin Shi, <sup>\*b</sup> and Zhaohui Wang<sup>\*a, b</sup>

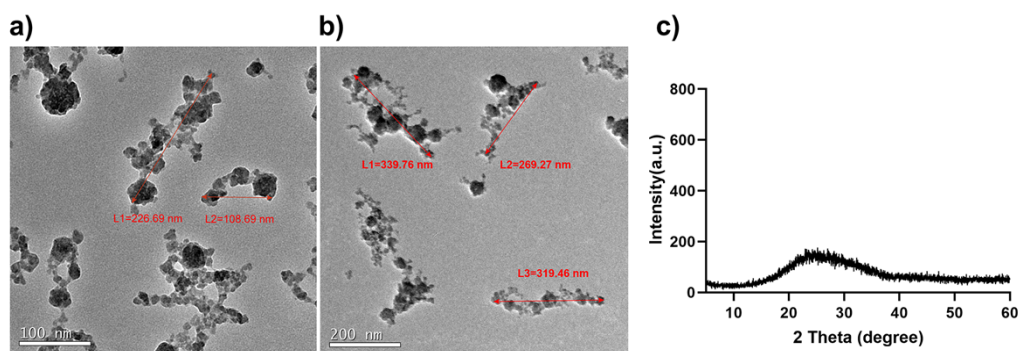

**Figure S1.** a)-b) TEM images of CuTe nano grape-clusters with the lengths of representative clusters calculated; c) XRD pattern of CuTe.

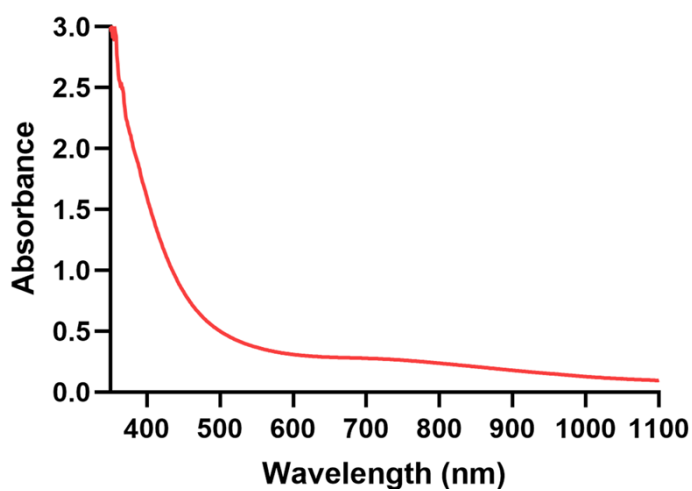

**Figure S2.** Absorbance spectrum of CuTe.

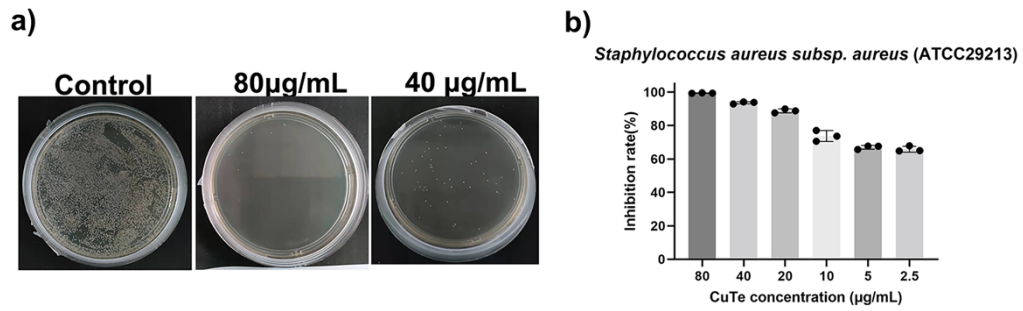

**Figure S3.** a) agar plates images of *S. aureus* treated with CuTe of different concentrations; b) micro-plate determination of inhibition rates of CuTe of different concentrations.

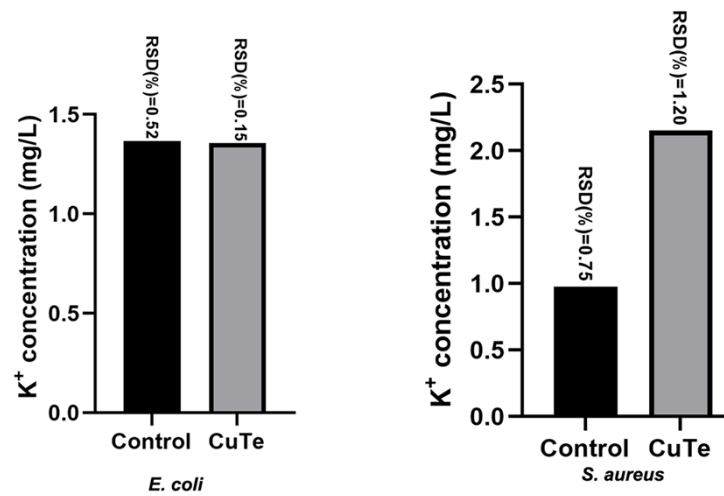

**Figure S4.** Extra-cellular K<sup>+</sup> quantification.

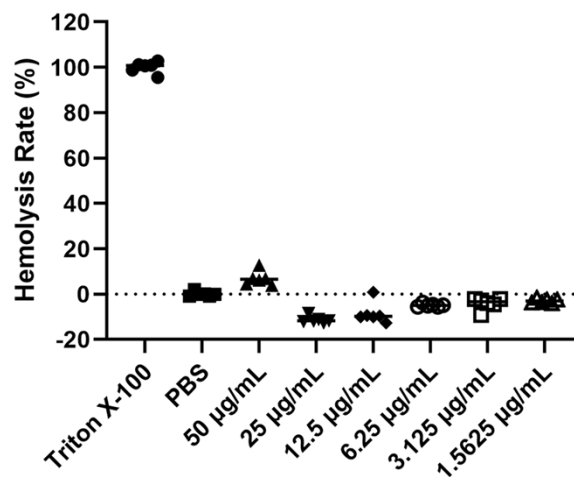

**Figure S5.** Hemolysis ratio of CuTe of different concentrations.
